# Supplementary material for: Targeted next-generation sequencing identifies clinically relevant somatic mutations in a large cohort of inflammatory breast cancer
Source: PubMed Central journal article supplement (PMC6081877; doi:10.1186/s13058-018-1007-x), 2018-08-07
Supplement: 13058_2018_1007_MOESM4_ESM.pdf [file 13058_2018_1007_MOESM4_ESM.pdf]

## S2a

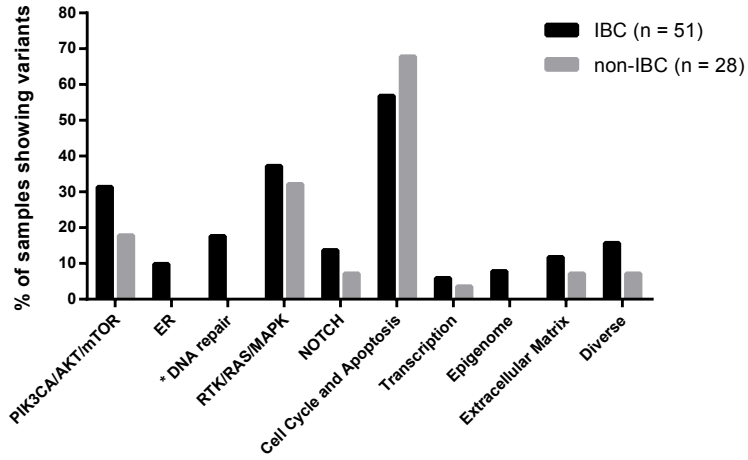

Mutated genes grouped by pathways

## S2b

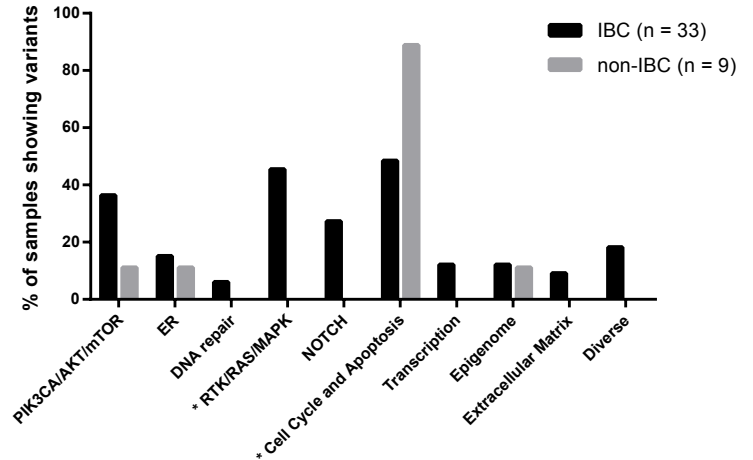

Mutated genes grouped by pathways

## S2c

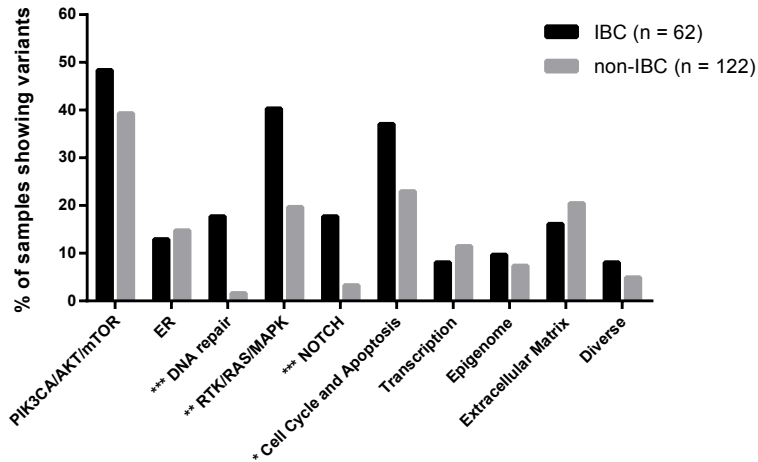

Mutated genes grouped by pathways

## S2d

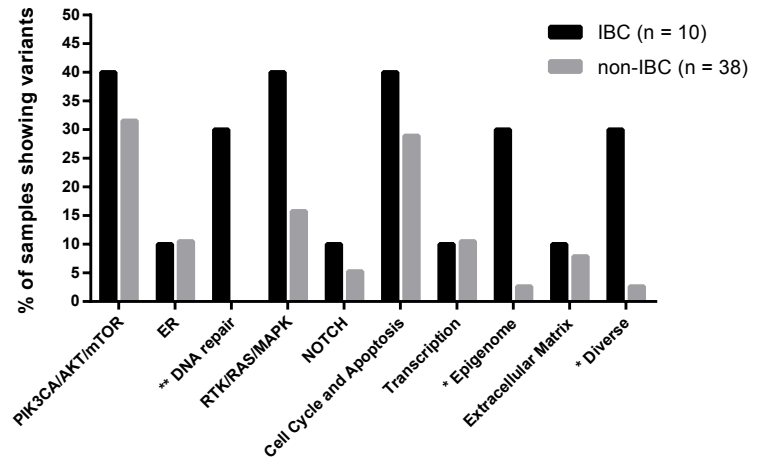

Mutated genes grouped by pathways
