# Supplementary material for: Targeted next-generation sequencing identifies clinically relevant somatic mutations in a large cohort of inflammatory breast cancer
Source: PubMed Central journal article supplement (PMC6081877; doi:10.1186/s13058-018-1007-x), 2018-08-07

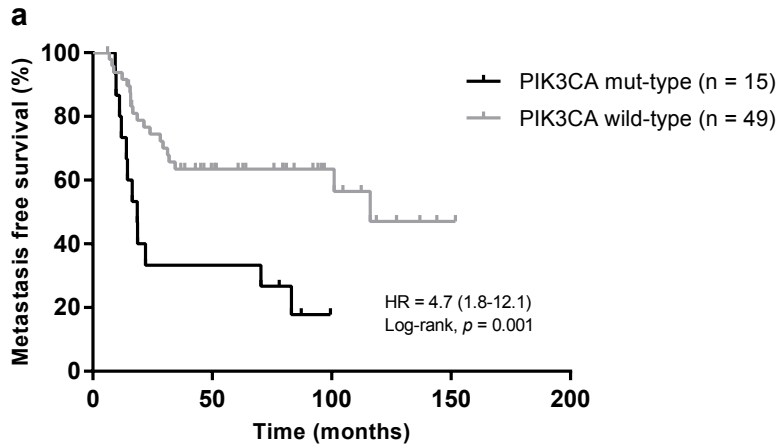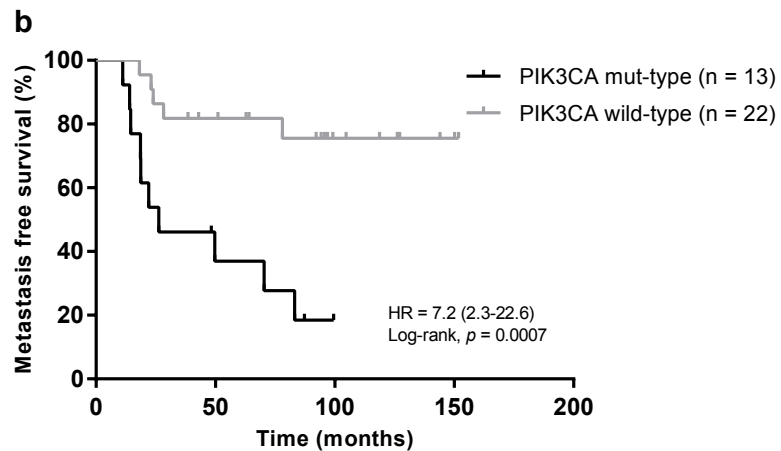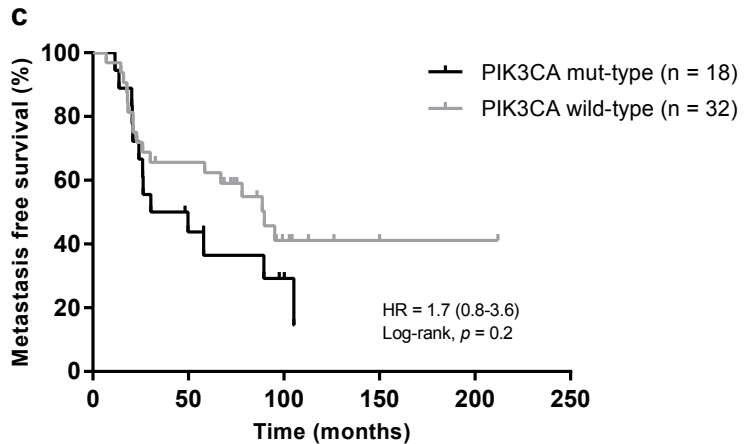

Supplement: 13058_2018_1007_MOESM6_ESM.pdf [file 13058_2018_1007_MOESM6_ESM.pdf]
