# Supplementary material for: Targeted next-generation sequencing identifies clinically relevant somatic mutations in a large cohort of inflammatory breast cancer
Source: Springer Nature journal article supplement (doi:10.1186/s13058-018-1007-x), 2018-08-07
Supplement: MOESM1 [file 16017444]

Table S1. Pathological and clinical characteristics of non-IBC cohorts

|                    | Non-IBC (%) |
|--------------------|-------------|
| Total              | 197 (100)   |
| Age(years)         |             |
| Median             | 59          |
| Range              | 34-90       |
| ≤ 50               | 62 (31.5)   |
| > 50               | 135 (68.5)  |
| Sex                |             |
| Female             | 197 (100)   |
| Male               | 0 (0)       |
| Stage              |             |
| IIIA               | 114 (57.9)  |
| IIIB               | 19 (9.6)    |
| IIIC               | 52 (26.4)   |
| IV                 | 12 (6.1)    |
| ER status          |             |
| Negative           | 39 (19.8)   |
| Positive           | 158 (80.2)  |
| PR status          |             |
| Negative           | 61 (31.0)   |
| positive           | 136 (69.0)  |
| Her2 status        |             |
| Negative           | 150 (76.1)  |
| Positive           | 47 (23.9)   |
| Subgroups          |             |
| TNBC               | 28 (14.2)   |
| HR-/Her2+          | 9 (4.6)     |
| HR+/Her2-          | 122 (61.9)  |
| HR+/Her2+          | 38 (19.3)   |
| Distant metastases |             |
| Yes                | 53 (26.9)   |
| No                 | 144 (73.1)  |
| Histologic type    |             |
| IDC                | 133 (67.5)  |
| ILC                | 50 (25.4)   |
| Others             | 14 (7.1)    |

IDC: invasive ductal carcinoma; ILC: invasive lobular carcinoma
