# Supplementary material for: Targeted next-generation sequencing identifies clinically relevant somatic mutations in a large cohort of inflammatory breast cancer
Source: Springer Nature journal article supplement (doi:10.1186/s13058-018-1007-x), 2018-08-07
Supplement: MOESM2 [file 16017444]

Table S2. BreastCurie gene panel for targeted NGS

| <b>Gene name</b> | <b>NM_</b> | <b>Pathway</b>           |
|------------------|------------|--------------------------|
| <i>CDKN1B</i>    | 004064.4   | Cell cycle and apoptosis |
| <i>PPP2R1A</i>   | 014225.5   |                          |
| <i>PTPN11</i>    | 002834.3   |                          |
| <i>RB1</i>       | 000321.2   |                          |
| <i>TP53</i>      | 000546.4   |                          |
| <i>STAG2</i>     | 006603.4   |                          |
| <i>TP53BP1</i>   | 005657.2   |                          |
| <i>CDK4</i>      | 000075.3   |                          |
| <i>CDK6</i>      | 001259.6   |                          |
| <i>TP73</i>      | 005427.3   |                          |
| <i>CDKN2A</i>    | 000077.4   |                          |
| <i>APAF1</i>     | 181861.1   |                          |
| <i>CASP8</i>     | 001228.4   |                          |
| <i>FBXW7</i>     | 033632.3   |                          |
| <i>NOTCH1</i>    | 017617.3   |                          |
| <i>NOTCH2</i>    | 024408.3   |                          |
| <i>NOTCH4</i>    | 004557.3   |                          |
| <i>ARID1A</i>    | 006015.4   | Epigenome                |
| <i>CTCF</i>      | 006565.3   |                          |
| <i>TBL1XR1</i>   | 024665.4   |                          |
| <i>CREBBP</i>    | 004380.2   |                          |
| <i>CHD4</i>      | 001273.2   |                          |
| <i>ESR1</i>      | 000125.3   | ER                       |
| <i>FOXA1</i>     | 004496.3   |                          |
| <i>GATA3</i>     | 002051,2   |                          |
| <i>NCOR1</i>     | 006311.3   |                          |
| <i>PGR</i>       | 000926.4   |                          |
| <i>AR</i>        | 000044.3   |                          |
| <i>BRAF</i>      | 004333.4   |                          |
| <i>EGFR</i>      | 005228.3   |                          |
| <i>FGFR1</i>     | 023110.2   |                          |
| <i>FGFR2</i>     | 000141.4   |                          |
| <i>FGFR3</i>     | 000142.4   |                          |
| <i>FGFR4</i>     | 002011.4   |                          |
| <i>ERBB2</i>     | 004448,3   |                          |
| <i>ERBB3</i>     | 001982.3   |                          |
| <i>ERBB4</i>     | 005235.2   |                          |
| <i>HRAS</i>      | 005343.2   |                          |
| <i>IGF1R</i>     | 000875.4   |                          |
| <i>KRAS</i>      | 004985.4   |                          |
| <i>MAP2K1</i>    | 002755.3   |                          |
| <i>MAP2K4</i>    | 003010.3   |                          |

| <b>Gene name</b> | <b>NM_</b> | <b>Pathway</b>       |
|------------------|------------|----------------------|
| <i>MAP3K1</i>    | 005921.1   | RTK/RAS/MAPK         |
| <i>MET</i>       | 000245.2   |                      |
| <i>NF1</i>       | 000267.3   |                      |
| <i>NRAS</i>      | 002524.4   |                      |
| <i>PDGFRA</i>    | 006206.4   |                      |
| <i>RAB40A</i>    | 080879.2   |                      |
| <i>RET</i>       | 020975.4   |                      |
| <i>ROS1</i>      | 002944.2   |                      |
| <i>FLT1</i>      | 002019.4   |                      |
| <i>KDR</i>       | 002253.2   |                      |
| <i>ALK</i>       | 004304.4   |                      |
| <i>DDR2</i>      | 006182.2   |                      |
| <i>KIT</i>       | 000222.2   |                      |
| <i>THBS1</i>     | 003246.2   | Extracellular matrix |
| <i>CDH1</i>      | 004360.3   |                      |
| <i>LAMA2</i>     | 000426.3   |                      |
| <i>LAMA4</i>     | 002290.4   |                      |
| <i>AKT1</i>      | 005163.2   | PIK3CA/AKT/mTOR      |
| <i>AKT2</i>      | 001626.5   |                      |
| <i>AKT3</i>      | 005465.4   |                      |
| <i>INPP4B</i>    | 003866.2   |                      |
| <i>MTOR</i>      | 004958.3   |                      |
| <i>PIK3CA</i>    | 006218.2   |                      |
| <i>PIK3R1</i>    | 181523.2   |                      |
| <i>PTEN</i>      | 000314.4   |                      |
| <i>STK11</i>     | 000455.4   |                      |
| <i>TSC1</i>      | 000368.4   |                      |
| <i>TSC2</i>      | 000548.3   |                      |
| <i>BRCA1</i>     | 007294.3   | DNA repair           |
| <i>BRCA2</i>     | 000059.3   |                      |
| <i>POLE</i>      | 006231.2   |                      |
| <i>RUNX1</i>     | 001754.4   | Transcription        |
| <i>TBX3</i>      | 016569.3   |                      |
| <i>NFE2L2</i>    | 006164.3   |                      |
| <i>MYB</i>       | 005375.2   |                      |
| <i>HIST1H3B</i>  | 003537.3   |                      |
| <i>SETD2</i>     | 014159.6   |                      |
| <i>MED1</i>      | 004774.3   |                      |
| <i>CBFB</i>      | 001755.2   |                      |
| <i>KEAP1</i>     | 012289.3   | Diverse              |
| <i>LDLRAP1</i>   | 015627.2   |                      |
| <i>STMN2</i>     | 007029.3   |                      |
| <i>MYO3A</i>     | 017433.4   |                      |

| <b>Gene name</b> | <b>NM_</b> | <b>Pathway</b> |
|------------------|------------|----------------|
| <i>VHL</i>       | 000551.3   | Diverse        |
| <i>AGTR2</i>     | 000686.4   |                |
| <i>CTNNB1</i>    | 001904.3   |                |
| <i>APC</i>       | 000038.5   |                |
| <i>SF3B1</i>     | 012433.2   |                |
| <i>MYH9</i>      | 002473.4   |                |
