# Supplementary material for: Targeted next-generation sequencing identifies clinically relevant somatic mutations in a large cohort of inflammatory breast cancer
Source: Springer Nature journal article supplement (doi:10.1186/s13058-018-1007-x), 2018-08-07

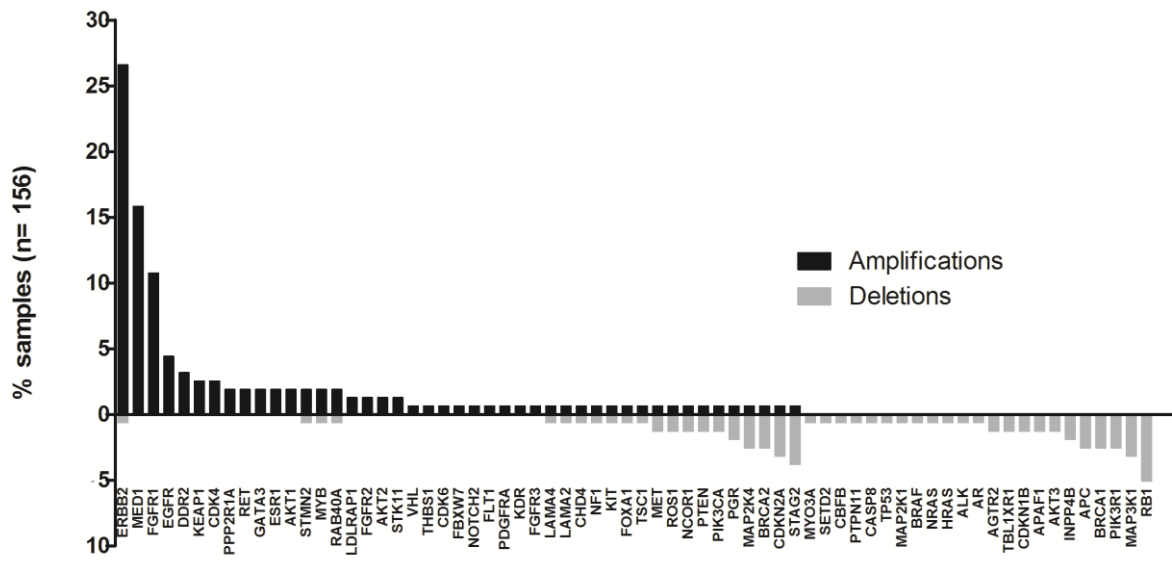

Supplement: MOESM5 [file 16017444]
